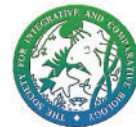

## SYMPOSIUM

# Character Evolution in Hydrozoa (phylum Cnidaria)

Paulyn Cartwright<sup>1</sup> and Annalise M. Nawrocki

Department of Ecology and Evolutionary Biology, University of Kansas, 1200 Sunnyside Ave, Lawrence, KS 66045, USA

From the symposium “Assembling the Cnidarian Tree of Life” presented at the annual meeting of the Society for Integrative and Comparative Biology, January 3–7, 2010, at Seattle, Washington.

<sup>1</sup>E-mail: pcart@ku.edu

**Synopsis** The diversity of hydrozoan life cycles, as manifested in the wide range of polyp, colony, and medusa morphologies, has been appreciated for centuries. Unraveling the complex history of characters involved in this diversity is critical for understanding the processes driving hydrozoan evolution. In this study, we use a phylogenetic approach to investigate the evolution of morphological characters in Hydrozoa. A molecular phylogeny is reconstructed using ribosomal DNA sequence data. Several characters involving polyp, colony, and medusa morphology are coded in the terminal taxa. These characters are mapped onto the phylogeny and then the ancestral character states are reconstructed. This study confirms the complex evolutionary history of hydrozoan morphological characters. Many of the characters involving polyp, colony, and medusa morphology appear as synapomorphies for major hydrozoan clades, yet homoplasy is commonplace.

## Introduction

Hydrozoans are a group of cnidarians that are noted for their complexity and diversity in life cycles. In many hydrozoan species, the life cycle consists of a free-living planula larva that transforms into a primary polyp. The primary polyp buds other polyps to produce a benthic colonial stage. Upon reproductive maturity, the polyps bud pelagic medusae that ultimately form gametes and spawn in the water column. Within hydrozoans there exists an extraordinary variation in this life cycle that is reflected in a wide range of diversity of polyp, colony, and medusa morphologies, as well as complete loss or reduction of the polyp or medusa stage in some species. The diversity of hydrozoan characters that involve changes in the morphology of these life cycle stages has long been considered important for classification. However, hydrozoan classification schemes have historically been met with much confusion, in large part due to classification based exclusively, or almost exclusively, on either the medusa (Rees 1957; Brinkmann-Voss 1970; Bouillon 1985) or polyp (e.g., Petersen 1979), producing, in many instances, conflicting classifications for different life-cycle stages (discussed by Hyman 1940; Rees 1957; Boero and Bouillon 1987). In addition, polyps, colonies, and

medusae can differ dramatically between closely related species, making it difficult to disentangle the evolutionary history of these different characters. More recently, consideration of the entire life cycle has been used for classification and many of the previous inconsistencies have been reconciled (e.g., Bouillon 1985; Petersen 1990; Schuchert 1996; Bouillon and Boero 2000; Bouillon et al. 2004; Schuchert 2004; Bouillon et al. 2006; Schuchert 2006, 2007). The application of molecular phylogenetic methods has enabled further refinement of hydrozoan classification (Collins et al. 2006), including the placement of enigmatic taxa (Miranda et al. 2010; Evans et al. 2008), and sorting species into well supported clades (Collins et al. 2005; Dunn et al. 2005; Collins et al. 2006; Govindarajan et al. 2006; Leclère et al. 2007; Cartwright et al. 2008; Collins et al. 2008; Lindner et al. 2008; Leclère et al. 2009; Miglietta et al. 2009; Nawrocki et al. 2010). However, given that several key families have not yet been sampled for molecular data and many of the relationships between major hydrozoan clades are not yet resolved (Cartwright et al. 2008), more work is needed before results from molecular data can inform major revisions in hydrozoan classification.

Elucidating the evolutionary history of hydrozoan characters involving the various life-cycle stages would prove useful not only for classification, but also for our understanding of homology, evolutionary loss, and convergence of these characters. Robust reconstructions of ancestral character states require a comprehensive taxonomic sampling, careful coding of morphological character states in terminal taxa, and well-resolved phylogenies. Through the Cnidarian Tree of Life project, a relatively large taxonomic sampling of ribosomal DNA sequences has been made available for phylogenetic investigation. Here we use these data to reconstruct a phylogeny of hydrozoans, code terminal taxa for morphological character states of polyp, colony, and medusa life-cycle stages, and trace the evolutionary history of these characters within a phylogenetic framework.

### Evolution Of Coloniality, Colonial Form, And Polymorphism

Hydrozoan colonies are composed of polyps that share a common gastrovascular cavity through the interconnection of tube-like stolons. Hydrozoans display a diversity of colonial forms ranging from stolonial and mat-like encrusting colonies; to upright, irregularly branched or regularly branched pinnate colonies; to pelagic colonies (Fig. 1A). The form of a colony is in large part dictated by the branching patterns of the stolons that connect the polyps (reviewed in Cartwright 2003; Cartwright 2004). Hydrozoans belonging to Porpitidae and Siphonophorae are pelagic colonies that display a highly organized arrangement of modified polyps and medusae within the colony that enables them to function efficiently in the water column (Fig. 1A, middle right). Other hydrozoans lack a colony and instead the benthic stage is represented by a solitary polyp (Fig 1A, right) or the polyp stage is lacking altogether and the planula larva develops directly into a medusa, such as found in Trachymedusae. Coloniality has generally been considered to be a derived state within Hydrozoa (Petersen 1979) and the presence of a polyp, presence of a colony, and colony form, appear important for defining hydrozoan clades. For example, species of the hydrozoan clade Trachylina either lack a polyp stage altogether or possess a very reduced one. Species of Leptothecata are almost all colonial, with many displaying an upright form. Within the polyphyletic Anthoathecata, the form of the colony is variable and some species have only a solitary polyp stage (e.g., Petersen 1979; Marques and Migotto 2001).

Some colonial hydrozoans display polymorphism of polyps, in which morphologically distinct and functionally specialized polyp types are found within the colony. In polymorphic colonies there is a division of labor between feeding and reproduction, and in some cases, defense. *Hydractinia*, a colonial hydrozoan that encrusts gastropod shells usually inhabited by hermit crabs, displays four different polyp types that specialize either in feeding (gastrozoid), reproduction (gonozoid), food gathering and defense (dactylozoid) (Fig. 1B), or defense only (tentaculozoid, not shown). Species of Siphonophorae are pelagic colonies comprising highly specialized polyp and medusoid forms (Fig. 1A, middle right).

### Position of the gonophore bud and the evolution of medusae

Upon reproductive maturity, the polyp/colonial stage will bud gonophores. The position of the gonophore bud and the fate of the gonophore vary within Hydrozoa. Most species bud gonophores in proximity to the polyps' tentacles, usually towards the oral end of the polyp (Fig. 1C, left). Some species bud their gonophores at the base of the polyp or from the stalk or stolon (Fig. 1C, right). Rees (1957) noted that those that bud gonophores near the mouth of the polyp often go through "reproductive exhaustion," losing their mouth and thus ability to feed in the process. Given this observation, he viewed the placement of the gonophore proximal to the base of the polyp, and away from the mouth, as an important evolutionary innovation. Species that bear a gonozoid, a specialized polyp that buds gonophores but does not feed, also achieve a physical separation of feeding and reproduction.

In some hydrozoans the gonophore develops into a medusa that detaches from the colony (or solitary polyp), swims, and feeds in the water column, ultimately reaching sexual maturity and spawning gametes. Most hydrozoans however lack a free-swimming medusa and instead the gonophore reaches sexual maturity while remaining attached to the polyp. The developmental stage of the gonophore upon sexual maturity can range from a sporosac that lacks any trace of medusae-like characters (Fig. 1D, left), to gonophores called medusoids that possess some but not all medusae-like characters, such as a canal system and remnants of tentacles (Fig. 1D, middle left), which may or may not detach from the colony, to a fully formed, swimming, feeding medusa (Fig. 1D right). In the Hydridae and other species with solitary reduced polyps gonophores

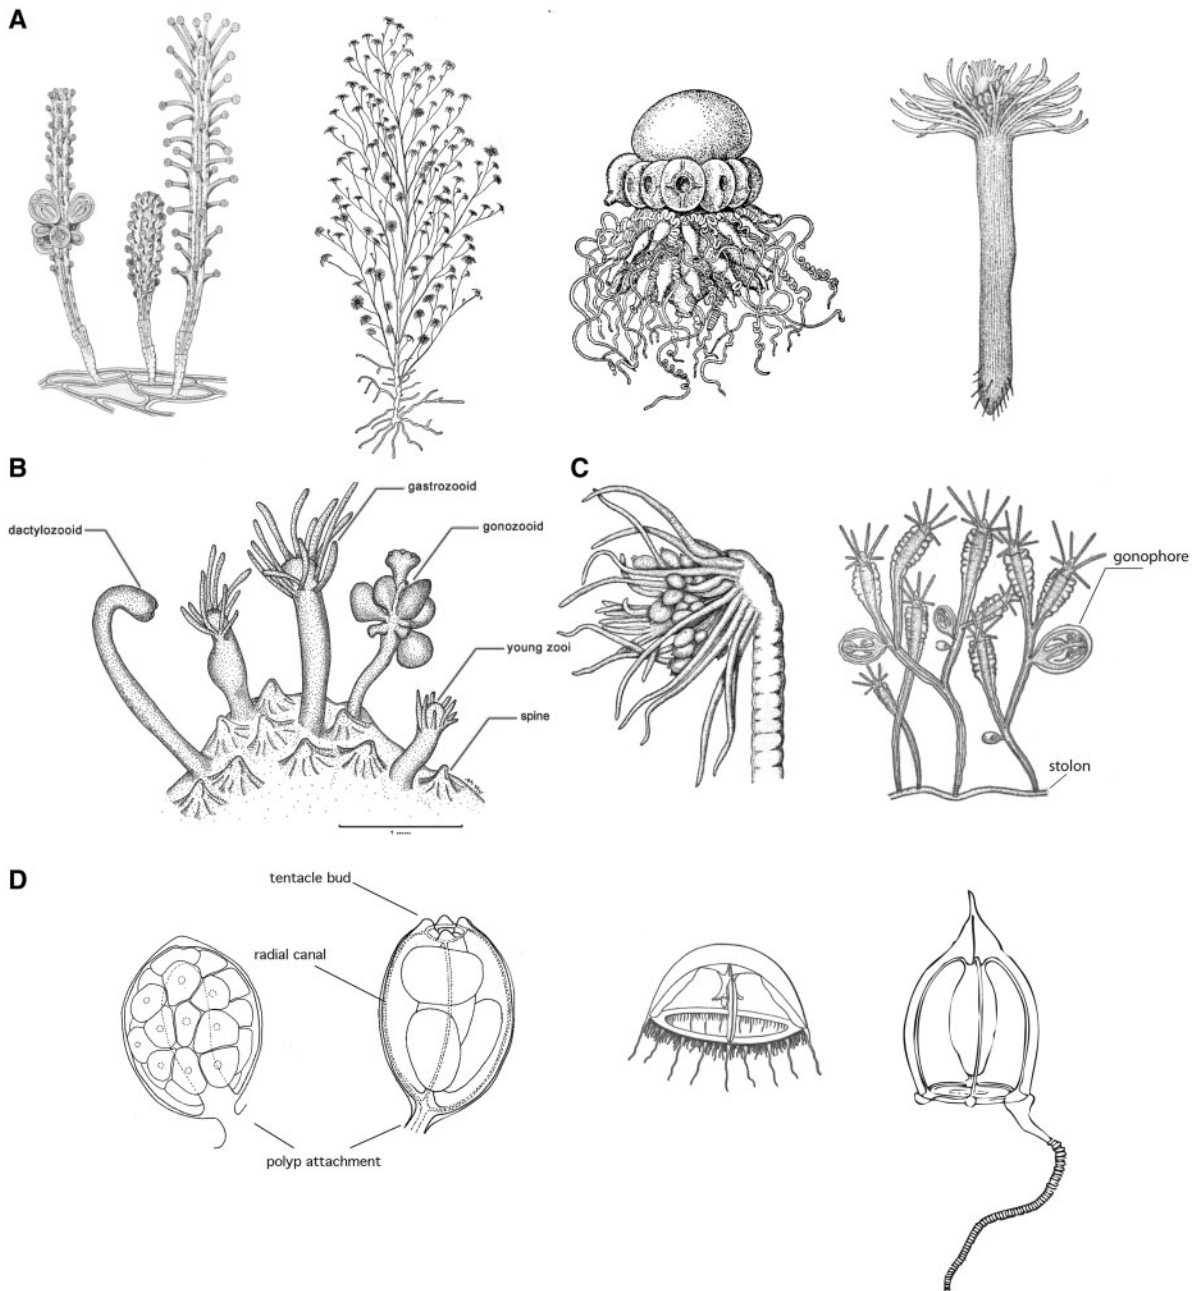

**Fig. 1** Life cycle characters in Hydrozoa. (A) Colony Structure. Left to right: stolonial colony of *Zanclea implexa*, upright colony of *Eudendrium* sp., pelagic siphonophore colony of *Stephalia* sp., solitary *Corymorpha pendula*. (B) Polymorphism. A polymorphic colony of *Hydractinia echinata*. Note three distinct polyp types—feeding polyps (gastrozooids), reproductive polyps (gonozooids) and defensive polyps (dactylozooids). (C) Gonophore placement. Left: a distal placement of the gonophores in *Ectopleura* sp. Right: a proximal placement of the gonophores in *Leukartiara octona*. (D) Medusae and reduced reproductive structures. Left to right: reduced structures—sporosac of *Coryne pusilla*, medusoid of *Pennaria disticha*; Hydromedusae— *Mitrocoma* sp. and *Corymorpha bigelowi*. *Zanclea implexa* and *Mitrocoma* sp. from A.G. Mayer (1910), *Ectopleura* sp. from C. W. Hargitt (1901), *Stephalia* sp. and *Eudendrium* sp. modified from L. H. Hyman (1940) and E. Haeckel (1888), *Leukartiara octona* from F. S. Russell (1953), *Corymorpha pendula* from C. M. Fraser (1937), *Corymorpha bigelowi* from F. S. Russell (1939), *Pennaria disticha* medusoid adapted from P. Schuchert (2006) and *Coryne pusilla* sporosac adapted from P. Schuchert (1996).

have been completely lost and the gametes develop within the ectoderm (e.g., *Hydra*, *Sympagohydra*, *Boreohydra* and *Protohydra*) or endoderm (e.g., *Brinkmannia hexactinellidophila*) of the polyp. The

presence of a medusa has been asserted to be ancestral for Hydrozoa (Marques and Collins 2004) and reduced medusae are thought to have been derived during hydrozoan evolution (Boero and Bouillon

1987; Boero and Sarà 1987). Recent phylogenetic hypotheses have supported multiple instances of loss of the medusal stage (Cunningham and Buss 1993; Govindarajan et al. 2006; Leclère et al. 2007; Leclère et al. 2009; Nawrocki et al. in review), partial regain as re-evolved medusoids (Leclère et al. 2009), and instances of re-evolved, fully formed medusae (Marques and Migotto 2001; Nawrocki et al. in review).

Given the apparent complex evolutionary history of hydrozoan life cycles with concomitant changes in polyp, colony, and medusa morphologies, we chose to investigate the evolution of some of these hydrozoan characters within a phylogenetic context. Specifically we coded character states involving overall colony form, polymorphism, position of the gonophore bud and type of gonophore upon sexual maturity. The characters were mapped onto the phylogeny and ancestral states were reconstructed in an effort to better understand the evolutionary history of these prominent components of hydrozoan diversity.

## Materials and methods

### Molecular data set

The 216 hydrozoan taxa and 14 other medusozoan outgroup taxa sampled in this study are arranged taxonomically in Table 1. DNA sequences used in the phylogenetic analysis are from the small and large nuclear ribosomal subunits (18S and 28S, respectively), and the large mitochondrial ribosomal subunit (16S). All sequences were retrieved from GenBank and accession numbers are shown in Table 1. The 28S and 18S DNA sequences were aligned according to secondary structure models generated for Cnidaria (M.S. Barbeitos, unpublished). Secondary structure models were constructed first by starting with DCSE (De Rijk and Wachter 1993) annotated templates from the scleractinian coral *Montastraea franksi*. For 18S, the template was downloaded from the European Ribosomal RNA Database (<http://bioinformatics.psb.ugent.be/webtools/rRNA/index.html>). For 28S, a starting template from Schnare et al. (1996) was used to hand code into DCSE format the 28S sequence from *Montastraea franksi* (GenBank# AY026375). The secondary structure models were further refined using representatives of all orders within Cnidaria. Sequences in this analysis were hand aligned in Genedoc v.2.6.002 (Nicholas et al. 1997) according to the models (M.S. Barbeitos, pers. comm.). Those regions that could not be confidently aligned according to the model were refined using MFold

(Zuker 2003). Base pairing in stems were evaluated using the PERL script *ReNATon* v0.88 (M.S. Barbeitos, University of Kansas) and alignment was corrected to maximize base pairing (M.S. Barbeitos, personal communication). Loops of variable length were realigned individually in Muscle (v. 3.7) (Edgar 2004) as implemented in SeaView (v.4.2.4) (Gouy et al. 2010).

Given the higher rate of evolution for 16S in Hydrozoa, generating a reliable secondary structure model proved problematic. Instead, 16S rDNA sequences were aligned in the program MAFFT (v.6) (Katoh and Kuma 2002) by employing the E-INS-i strategy (Katoh and Toh 2008). Ambiguously aligned regions in the 18S and 28S loops and in the 16S MAFFT alignment were removed using Gblocks v0.91b (Castresana 2000) under default parameters, except with minimum block length set to five and allowing up to half the taxa to have gaps. Sequences were concatenated in Mesquite (v. 2.72) (Maddison and Maddison 2007) to produce a combined DNA sequence matrix comprising 4513 characters (2664 from 28S, 1472 from 18S and 377 from 16S).

### Phylogenetic analysis

Phylogenetic analysis was performed on the combined partitioned data set using maximum likelihood (ML) criteria as implemented in RAxML 7.0.1 (Stamatakis 2006). Two-hundred independent ML searches were conducted under the GTRMIX model using default settings for both number of categories of the gamma distribution and number of re-arrangements of the starting maximum parsimony tree. Node support was also assessed in RAxML using 1000 bootstrap replicates. Support was mapped onto the ML tree using the program SumTrees (Sukumaran and Holder 2009).

### Morphological character coding

Morphological characters were coded by consultation of relevant literature. We relied heavily on a recent book by Bouillon et al. (2006) as well as other relevant monographs (Hyman 1940; Petersen 1990; Svoboda and Cornelius 1991; Marques and Migotto 2001; Schuchert 2001, 2006, 2007) and when prudent, original species descriptions. Four morphological characters were coded: the degree of development of the gonophore upon sexual maturity (medusa/medusoid/sporosac/none), the organization of the polyp stage (encrusting colony/upright colony/pelagic colony/solitary/not applicable), types of polymorphic polyps (gastrozoid only/gastrozoid and gonozoid/gastrozoid and dactylozoid/all three polyp types),

**Table 1** Samples with GenBank accession numbers, voucher numbers when available, and coding of morphological characters

| Taxonomic hierarchy             | Species                            | GenBank accession numbers |          |               | Voucher       | Characters |   |   |   |
|---------------------------------|------------------------------------|---------------------------|----------|---------------|---------------|------------|---|---|---|
|                                 |                                    | 28s                       | 18s      | 16s           |               | 1          | 2 | 3 | 4 |
| <b>Hydrozoa</b>                 |                                    |                           |          |               |               |            |   |   |   |
| Anthoathecata                   |                                    |                           |          |               |               |            |   |   |   |
| Aplanulata                      |                                    |                           |          |               |               |            |   |   |   |
| Candelabridae                   | <i>Candelabrum cocksii</i>         | AY920796                  | AY920758 | AY512520      | MHNGINVE29591 | 2          | 3 | 0 | 1 |
|                                 | <i>Candelabrum</i> sp.             | EU879929                  |          | EU876530      |               | ?          | 3 | 0 | ? |
| Corymorphidae                   | <i>Corymorpha bigelowi</i>         | EU272563                  | EU272618 | EU448099      | KUNHM2829     | 0          | 3 | 0 | 1 |
|                                 | <i>Corymorpha intermedia</i>       | EU879930                  | AY920759 | AY512526      |               | 0          | 3 | 0 | 1 |
|                                 | <i>Corymorpha nutans</i>           | EU879931                  | EU876558 | EU876532      | MHNGINVE48745 | 0          | 3 | 0 | 1 |
|                                 | <i>Corymorpha pendula</i>          | EU879936                  | EU876565 | EU876538      | KUNHM2962     | 1          | 3 | 0 | 1 |
|                                 | <i>Euphysa aurata</i>              | EU879934                  | EU876562 | EU876536      | MHNGINVE48753 | 0          | 3 | 0 | 1 |
|                                 | <i>Euphysa tentacula</i>           | EU879935                  | EU876563 | EU876537      |               | 0          | 3 | 0 | 1 |
| Hydridae                        | <i>Hydra circumcincta</i>          | EU879939                  | EU876568 | EU876541      |               | 3          | 3 | 0 | 2 |
|                                 | <i>Hydra viridissima</i>           | EU879940                  | EU876569 | EU876542      |               | 3          | 3 | 0 | 2 |
|                                 | <i>Hydra vulgaris</i>              | EU879941                  | EU876570 | EU876543      |               | 3          | 3 | 0 | 2 |
| Tubulariidae                    | <i>Ectopleura crocea</i>           | EU879932                  | EU876559 | EU876533      | MHNGINVE34010 | 2          | 1 | 0 | 1 |
|                                 | <i>Ectopleura dumortieri</i>       | EU879933                  | EU876561 | EU876534      |               | 0          | 3 | 0 | 1 |
|                                 | <i>Ectopleura larynx</i>           | EU879943                  | EU876572 | EU876545      | KUNHMDIZ2963  | 2          | 1 | 0 | 1 |
|                                 | <i>Ectopleura marina</i>           | EU883553                  | EU883547 | EU883542      |               | 2          | 1 | 0 | 1 |
|                                 | <i>Hybocodon chilensis</i>         | EU879937                  | EU876566 | EU876539      | MHNGINVE36023 | 0          | 3 | 0 | 1 |
|                                 | <i>Hybocodon prolifer</i>          | EU879938                  | EU876567 | EU876540      |               | 0          | 3 | 0 | 1 |
|                                 | <i>Ralpharia gorgoniae</i>         | EU272590                  | EU272633 | EU305482      | KUNHM2778     | 1          | 3 | 0 | 1 |
|                                 | <i>Tubularia indivisa</i>          | EU879942                  | EU876571 | EU876544      |               | 2          | 3 | 0 | 1 |
|                                 | <i>Zyzyzus warreni</i>             | EU272599                  | EU272640 | EU305489      | KUNHM2777     | 2          | 3 | 0 | 1 |
| Capitata                        |                                    |                           |          |               |               |            |   |   |   |
| Asyncorynidae                   | <i>Asyncoryne ryniensis</i>        | GQ424289                  | EU876578 | EU876552      | KUNHMDIZ2639  | 0          | 0 | 0 | 1 |
| Cladocorynidae                  | <i>Cladocoryne floccosa</i>        | EU272551                  | EU272608 | EU876554      |               | 2          | 0 | 0 | 1 |
| Cladonematidae                  | <i>Eleutheria claparedei</i>       | GQ424292                  | GQ424320 | AM088486      | MHNGINVE34228 | 0          | 0 | 0 | 1 |
|                                 | <i>Eleutheria dichotoma</i>        | GQ424291                  | GQ424321 | AY512538      |               | 0          | 0 | 0 | 1 |
|                                 | <i>Staurocladia radiatum</i>       | GQ424290                  | EU448096 | AM088482      |               | 0          | 0 | 0 | 1 |
|                                 | <i>Staurocladia wellingtoni</i>    | EU879948                  | GQ424323 | EU876550      | MHNGINVE25379 | 0          | 1 | 0 | 1 |
| Corynidae                       | <i>Codium prolifera</i>            | GQ424302                  |          | GQ395318      | MHNGINVE49490 | 0          | ? | ? | ? |
|                                 | <i>Coryne epizoica</i>             | GQ424295                  |          | GQ395314      | MHNGINVE37171 | ?          | 0 | 0 | ? |
|                                 | <i>Coryne eximia</i>               | GQ424296                  | GQ424325 | AJ878713      | MHNGINVE34009 | 0          | 1 | 0 | 1 |
|                                 | <i>Coryne muscoides</i>            | GQ424298                  | GQ424328 | GQ395315      |               | 2          | 1 | 0 | 1 |
|                                 | <i>Coryne pintneri</i>             | GQ424303                  | GQ424330 | AJ878717      | MHNGINVE31976 | 2          | 0 | 0 | 1 |
|                                 | <i>Coryne pusilla</i>              | GQ424304                  | AJ133558 | AY512552      | MHNGINVE35756 | 2          | 1 | 0 | 1 |
|                                 | <i>Coryne uchidai</i>              | GQ424306                  | GQ424332 | GQ395320      | MHNGINVE49102 | 2          | 0 | 0 | 1 |
|                                 | <i>Dipurena halterata</i>          | EU883550                  | EU883544 | AM084261      | MHNGINVE31741 | 0          | 0 | 0 | 1 |
|                                 | <i>Polyorchis haplus</i>           | GQ424317                  | GQ424344 | AY512549      |               | 0          | ? | ? | ? |
|                                 | <i>Sarsia lovenii</i>              | GQ424310                  | GQ424337 | GQ395329      | MHNGINVE48736 | 1          | 0 | 0 | 1 |
|                                 | <i>Sarsia princeps</i>             | EU879947                  | EU876575 | EU876549      |               | 0          | 0 | 0 | 1 |
|                                 | <i>Sarsia striata</i>              | GQ424311                  | GQ424338 | GQ395328      | MHNGINVE35765 | 0          | 0 | 0 | 1 |
|                                 | <i>Sarsia tubulosa</i>             | EU879946                  | EU876574 | EU876548      | MHNGINVE35763 | 0          | 0 | 0 | 1 |
|                                 | <i>Scrippisia pacifica</i>         | AY920804                  | AF358091 | AY512551      |               | 0          | ? | ? | ? |
|                                 | <i>Stauridiosarsia cliffordi</i>   | GQ424294                  | GQ424324 | GQ395313      | MHNGINVE36025 | 0          | 1 | 0 | 1 |
|                                 | <i>Stauridiosarsia gemmifera</i>   | EU879945                  | EU876573 | EU876547      |               | 0          | 0 | 0 | 1 |
|                                 | <i>Stauridiosarsia nipponica</i>   | GQ424299                  | GQ424329 | GQ395333      | KUNHM2627     | 0          | 0 | 0 | 1 |
|                                 | <i>Stauridiosarsia ophiogaster</i> | EU272560                  | EU272615 | EU305473      | KUNHM2803     | 0          | 0 | 0 | 1 |
| <i>Stauridiosarsia producta</i> | GQ424301                           | GQ424331                  | GQ395317 | MHNGINVE48751 | 0             | 0          | 0 | 1 |   |
| <i>Stauridiosarsia reesi</i>    | GQ424308                           | GQ424334                  | GQ395321 |               | 0             | 0          | 0 | 1 |   |
| Hydrocorynidae                  | <i>Hydrocoryne miurensis</i>       | GQ424313                  |          |               | KUNHM2814     | 0          | 3 | 0 | 1 |
| Milleporidae                    | <i>Millepora</i> sp.               | EU879950                  | EU876577 | EU876551      |               | 1          | 1 | 2 | 0 |
| Moerisiidae                     | <i>Moerisia</i> sp.                | AY920801                  | AF358083 | AY512534      |               | 0          | 3 | 0 | 1 |
|                                 | <i>Odessia maeotica</i>            | GQ424314                  | GQ424341 | GQ395324      | MHNGINVE53642 | 0          | 3 | 0 | 1 |

(continued)

Table 1 Continued

| Taxonomic hierarchy  | Species                                 | GenBank accession numbers |          |          | Voucher       | Characters |   |   |   |
|----------------------|-----------------------------------------|---------------------------|----------|----------|---------------|------------|---|---|---|
|                      |                                         | 28s                       | 18s      | 16s      |               | 1          | 2 | 3 | 4 |
| Pennariidae          | <i>Pennaria disticha</i>                | GQ424316                  | GQ424342 | AM088481 | MHNGINVE29809 | 1          | 1 | 0 | 1 |
| Porpitidae           | <i>Porpita porpita</i>                  | EU883551                  | GQ424319 | AY935322 |               | 0          | 2 | 3 | 1 |
|                      | <i>Porpita</i> sp.                      | AY920803                  | AF358086 |          |               | 0          | 2 | 3 | 1 |
|                      | <i>Velella velella</i>                  | EU879949                  | EU876576 | EU305487 |               | 0          | 2 | 3 | 1 |
| Solanderiidae        | <i>Solandaria ericopsis</i>             | EU272593                  | EU272636 | AY512530 | MHNGINVE29593 | 1          | 1 | 0 | 0 |
|                      | <i>Solandaria secunda</i>               | EU305533                  | EU305502 | EU305484 | KUNHM2611     | 1          | 1 | 0 | 0 |
| Sphaerocorynidae     | <i>Sphaerocoryne agassizii</i>          | GQ424318                  |          | GQ395323 |               | 0          | 0 | 0 | 1 |
| Zanclidae            | <i>Zanclia costata</i>                  | EU879951                  | EU876579 | EU876553 | MHNGINV26507  | 0          | 0 | 0 | 1 |
|                      | <i>Zanclia prolifera</i>                | EU272598                  | EU272639 |          | KUNHM2793     | 0          | ? | ? | ? |
| Filifera I           |                                         |                           |          |          |               |            |   |   |   |
| Eudendriidae         | <i>Eudendrium californicum</i>          | EU305513                  | EU305492 | EU305475 | KUNHM2858     | 2          | 1 | 1 | 1 |
|                      | <i>Eudendrium capillare</i>             | EU305514                  |          | EU305476 | KUNHM2625     | 2          | 1 | 1 | 1 |
|                      | <i>Eudendrium glomeratum</i>            | FJ550440                  | FJ550583 | AM991301 | MHNGINVE49717 | 2          | 1 | 1 | 1 |
|                      | <i>Eudendrium racemosum</i>             | EU272562                  |          | AY787896 | MHNGINVE32164 | 2          | 1 | 1 | 1 |
| Filifera II          |                                         |                           |          |          |               |            |   |   |   |
| <i>incerta sedis</i> | <i>Brinckmannia hexactinellidophila</i> | EU272550                  | EU272607 | AM183123 | MHNGINVE38148 | 3          | 3 | 0 | 1 |
| Laingiidae           | <i>Fabienna sphaerica</i>               | AY920797                  | AY920767 | AM183133 | MHNGINVE33453 | 0          | ? | ? | ? |
| Ptilocodiidae        | <i>Hydrichthella epigorgia</i>          | EU272569                  | EU272622 | EU305478 | KUNHM2665     | 1          | 0 | 3 | 1 |
| Proboscoidactylidae  | <i>Proboscoidactyla flavicirrata</i>    | EU305527                  | EU305500 | EU305480 |               | 0          | 0 | 3 | 1 |
|                      | <i>Proboscoidactyla ornata</i>          | EU272587                  | EU272631 | EU305481 | KUNHM2767     | 0          | 0 | 3 | 1 |
| Filifera III         |                                         |                           |          |          |               |            |   |   |   |
| Bougainvilliidae     | <i>Dicoryne conybeari</i>               | EU272559                  | EU272614 | AM183141 | MHNGINVE32949 | 2          | 0 | 1 | 1 |
| Hydractiniidae       | <i>Clava multicornis</i>                | EU272552                  | EU272609 | EU305471 |               | 2          | 0 | 0 | 1 |
|                      | <i>Clavactinia gallensis</i>            | EU272553                  | EU272610 | EU448101 | MHNGINVE33470 | 2          | 0 | 1 | 1 |
|                      | <i>Hydractinia symbiolongicarpus</i>    | EU272568                  | EU272621 | FJ214380 |               | 2          | 0 | 3 | 1 |
|                      | <i>Podocoryna exigua</i>                | AY920802                  | AF358092 | AY512513 |               | 0          | 0 | 1 | 1 |
|                      | <i>Podocorynoides minima</i>            | EU883552                  |          | AM183125 |               | 0          | ? | ? | ? |
| Stylasteridae        | <i>Adelopora crassilabrum</i>           | EU272541                  | EU272642 | EU645356 | USNM1027760   | 2          | 1 | 3 | 0 |
|                      | <i>Conopora anthohelia</i>              | EU305509                  | EU645429 | EU645268 | USNM1027755   | 2          | 1 | 3 | 0 |
|                      | <i>Crypthelia cryptotrema</i>           | EU272558                  | EU272641 | EU645281 | USNM1027758   | 2          | 1 | 3 | 0 |
|                      | <i>Lepidopora microstylus</i>           | EU272572                  | EU272644 | EU645329 | USNM1027724   | 2          | 1 | 3 | 0 |
|                      | <i>Pseudocrypthelia pachypoma</i>       | EU272589                  | EU272643 | EU645280 | USNM1027728   | 2          | 1 | 3 | 0 |
| Filifera IV          |                                         |                           |          |          |               |            |   |   |   |
| Bougainvilliidae     | <i>Bimeria vestita</i>                  | EU272548                  | EU272605 | AM183130 |               | 2          | 1 | 0 | 0 |
|                      | <i>Bougainvillia carolinensis</i>       | EU272549                  | EU272606 |          |               | 0          | 1 | 0 | 0 |
|                      | <i>Bougainvillia fulva</i>              | EU305507                  | EU305490 | EU305470 | KUNHM2816     | 0          | 1 | 0 | 0 |
|                      | <i>Bougainvillia muscus</i>             | FJ550439                  | FJ550582 | AM411410 | MHNGINVE48761 | 0          | 1 | 0 | 0 |
|                      | <i>Garveia annulata</i>                 | EU272564                  | AY920766 |          | KUNHM2860     | 2          | 1 | 0 | 0 |
|                      | <i>Garveia grisea</i>                   | EU272588                  | EU272632 | AM183131 | MHNGINVE34436 | 2          | 1 | 0 | 0 |
|                      | <i>Koellikerina fasciculata</i>         | EU272571                  | EU272623 | AM183129 |               | 0          | 0 | 0 | 0 |
|                      | <i>Pachycordyle pusilla</i>             | EU272579                  | EU272627 | AM183132 | MHNGINVE32953 | 2          | 0 | 0 | 0 |
| Cytaeidae            | <i>Perarella schneideri</i>             | HM357628                  | HM357626 |          |               | 1          | 0 | 2 | 0 |
| Oceaniidae           | <i>Cordylophora caspia</i>              | EU272556                  | EU272612 | EU305472 |               | 2          | 1 | 0 | 0 |
|                      | <i>Rhizogeton nudus</i>                 | EU272592                  | EU272635 | AY787883 | MHNGINVE35757 | 2          | 0 | 0 | 0 |
|                      | <i>Turritopsis dohrnii</i>              | EU272596                  | EU272638 | AY787889 | MHNGINVE29753 | 0          | 1 | 0 | 0 |
|                      | <i>Turritopsis</i> sp.                  | EU305538                  | EU305504 | EU305486 | KUNHM2817     | 0          | 1 | 0 | 0 |
| Pandeidae            | <i>Hydrichthys boycei</i>               | EU272570                  | EU305496 | EU448102 | MHNGINVE37417 | 0          | 0 | 1 | 0 |
|                      | <i>Leuckartiara octona</i>              | EU272573                  | EU272624 | AM411421 |               | 0          | 0 | 0 | 0 |
|                      | <i>Neoturris brevicornis</i>            | EU305524                  | EU448097 | EU448103 |               | 0          | 0 | 0 | 0 |
|                      | <i>Pandea</i> sp.                       | EU272580                  |          |          |               | 0          | 0 | 2 | 0 |
| Rathkeidae           | <i>Lizzia blondina</i>                  | EU272574                  | EU272625 | AM411417 |               | 0          | ? | ? | 0 |
|                      | <i>Rathkea octopunctata</i>             | EU272591                  | EU272634 | EU305483 | KUMIP314321   | 0          | 0 | ? | ? |

(continued)

Table 1 Continued

| Taxonomic hierarchy          | Species                           | GenBank accession numbers |          |          | Voucher       | Characters    |   |   |   |
|------------------------------|-----------------------------------|---------------------------|----------|----------|---------------|---------------|---|---|---|
|                              |                                   | 28s                       | 18s      | 16s      |               | 1             | 2 | 3 | 4 |
| Leptothecata                 |                                   |                           |          |          |               |               |   |   |   |
| Macrocolonia                 |                                   |                           |          |          |               |               |   |   |   |
| Aglaopheniidae               | <i>Aglaophenia elongata</i>       | FJ550450                  | FJ550593 | FJ550508 | MHNGINVE37539 | 2             | 1 | 3 | 1 |
|                              | <i>Aglaophenia harpago</i>        | FJ550449                  | FJ550592 | FJ550506 | MHNGINVE37531 | 2             | 1 | 3 | 1 |
|                              | <i>Aglaophenia octodonta</i>      | FJ550397                  | FJ550541 | AM887989 | MHNGINVE32875 | 2             | 1 | 3 | 1 |
|                              | <i>Aglaophenia pluma</i>          | FJ550398                  | FJ550542 | DQ855916 | MHNGINVE38220 | 2             | 1 | 3 | 1 |
|                              | <i>Aglaophenia tubiformis</i>     | EU272543                  | EU272601 | AM887991 | MHNGINVE31751 | 2             | 1 | 3 | 1 |
|                              | <i>Cladocarpus integer</i>        | FJ550453                  | FJ550597 | FJ550512 | MHNGINVE48754 | 2             | 1 | 3 | 1 |
|                              | <i>Gymnangium gracilicaule</i>    | FJ550442                  | FJ550585 | DQ855934 | MHNGINVE36839 | 2             | 1 | 3 | 1 |
|                              | <i>Lytocarpia</i> sp.             | FJ550448                  | FJ550591 | AY787921 | MHNGINVE36828 | 2             | 1 | 3 | 1 |
|                              | <i>Macrorhynchia phoenicea</i>    | FJ550441                  | FJ550584 | DQ855935 | MHNGINVE36813 | 2             | 1 | 3 | 1 |
|                              | Haleciidae                        | <i>Halecium labrosum</i>  | FJ550407 | FJ550550 | AY787916      | MHNGINVE29030 | 2 | 1 | 1 |
| <i>Halecium lenticulare</i>  |                                   | FJ550387                  |          | FJ550469 | MHNGINVE33461 | 2             | 1 | 1 | 1 |
| <i>Halecium muricatum</i>    |                                   | FJ550408                  | FJ550551 | AY787915 | MHNGINVE29028 | 2             | 1 | 1 | 1 |
| <i>Halecium pusillum</i>     |                                   | FJ550437                  | FJ550580 | FJ550499 | MHNGINVE36295 | 2             | 1 | 1 | 1 |
| <i>Hydranthea margarica</i>  |                                   | FJ550424                  | FJ550567 | DQ855932 |               | 1             | 0 | 1 | 1 |
| <i>Hydrodendron mirabile</i> |                                   | FJ550425                  | FJ550568 | DQ855933 | MHNGINVE34779 | 2             | 1 | 3 | 1 |
| Halopterididae               | <i>Antennella ansini</i>          | FJ550388                  | FJ550533 | AY787890 | MHNGINVE32157 | 2             | 1 | 3 | 1 |
|                              | <i>Antennella kiwiana</i>         | FJ550389                  | FJ550534 | DQ855918 | MHNGINVE33623 | 2             | 1 | 3 | 1 |
|                              | <i>Antennella secundaria</i>      | FJ550432                  | FJ550575 | DQ883445 | MHNGINVE32969 | 2             | 1 | 3 | 1 |
|                              | <i>Halopteris carinata</i>        | FJ550433                  | FJ550576 | DQ855919 | MHNGINVE35473 | 2             | 1 | 3 | 1 |
|                              | <i>Halopteris diaphana</i>        | FJ550378                  | FJ550525 | DQ855921 | MHNGINVE30116 | 2             | 1 | 3 | 1 |
|                              | <i>Halopteris liechtensternii</i> | FJ550379                  | FJ550526 | AY787888 | MHNGINVE30116 | 2             | 1 | 3 | 1 |
|                              | <i>Halopteris minuta</i>          | EU272567                  | EU272620 | AY787912 | MHNGINVE25073 | 2             | 1 | 3 | 1 |
|                              | <i>Halopteris schucherti</i>      | FJ550434                  | FJ550577 |          | MHNGINVE35930 | 2             | 1 | 3 | 1 |
|                              | <i>Monostaechas quadridens</i>    | EU305521                  | EU305497 | DQ855941 |               | 2             | 1 | 3 | 1 |
| Kirchenpaueriidae            | <i>Kirchenpaueria pinnata</i>     | FJ550435                  | FJ550578 | AY787911 | MHNGINVE36294 | 2             | 1 | 3 | 1 |
|                              | <i>Kirchenpaueria similis</i>     | FJ550438                  | FJ550581 | DQ855923 | MHNGINVE36296 | 2             | 1 | 3 | 1 |
| Plumulariidae                | <i>Plumularia obliqua</i>         | FJ550401                  | FJ550544 | DQ855929 |               | 1             | 1 | 3 | 1 |
|                              | <i>Nemertesia antennina</i>       | EU305523                  | EU305498 | AM888329 | MHNGINVE29954 | 2             | 1 | 3 | 1 |
|                              | <i>Plumularia filicaulis</i>      | FJ550422                  | FJ550565 | DQ855926 | MHNGINVE34020 | 2             | 1 | 3 | 1 |
|                              | <i>Plumularia habereri</i>        | FJ550428                  | FJ550571 |          |               | 2             | 1 | 3 | 1 |
|                              | <i>Plumularia hyalina</i>         | EU305525                  | EU305499 | AY787913 | MHNGINVE25333 | 2             | 1 | 3 | 1 |
|                              | <i>Plumularia</i> sp.             | FJ550421                  | FJ550564 | FJ550491 | MHNGINVE34019 | 2             | 1 | 3 | 1 |
|                              | <i>Plumularia margaretta</i>      | FJ550410                  | FJ550553 | AY787892 | MHNGINVE29760 | 2             | 1 | 3 | 1 |
|                              | <i>Plumularia pulchella</i>       | FJ550419                  | FJ550562 |          | MHNGINVE34016 | 2             | 1 | 3 | 1 |
|                              | <i>Plumularia setacea</i>         | EU272583                  | EU272628 | AY787886 | MHNGINVE36298 | 2             | 1 | 3 | 1 |
|                              | <i>Plumularia setaceoides</i>     | FJ550394                  | FJ550538 | DQ855931 | MHNGINVE33460 | 2             | 1 | 3 | 1 |
|                              | <i>Plumularia spiralis</i>        | FJ550426                  | FJ550569 | AY787920 | MHNGINVE32600 | 2             | 1 | 3 | 1 |
|                              | <i>Plumularia strictocarpa</i>    | HM357629                  | HM357627 | DQ855940 |               | 2             | 1 | 3 | 1 |
| Sertulariidae                | <i>Abietinaria abietina</i>       | FJ550411                  | FJ550554 | AY787898 |               | 2             | 1 | 1 | 1 |
|                              | <i>Abietinaria filicula</i>       | EU272540                  | EU272600 | AY787899 | MHNGINVE29947 | 2             | 1 | 1 | 1 |
|                              | <i>Amphisbetia minima</i>         | EU272544                  | EU272602 | AY787903 | MHNGINVE25071 | 2             | 1 | 1 | 1 |
|                              | <i>Amphisbetia operculata</i>     | FJ550418                  | FJ550561 | FJ550489 | MHNGINVE34014 | 1             | 1 | 1 | 1 |
|                              | <i>Diphasia fallax</i>            | FJ550414                  | FJ550557 | AY787901 | MHNGINVE29950 | 2             | 1 | 1 | 1 |
|                              | <i>Dynamena moluccana</i>         | FJ550429                  | FJ550572 | FJ550494 |               | 2             | 1 | 1 | 1 |
|                              | <i>Hydrallmania falcata</i>       | FJ550416                  | FJ550559 | AY787900 | MHNGINVE29948 | 2             | 1 | 1 | 1 |
|                              | <i>Sertularella africana</i>      | FJ550420                  | FJ550563 | FJ550490 | MHNGINVE34017 | 2             | 1 | 1 | 1 |
|                              | <i>Sertularia cupressina</i>      | FJ550395                  | FJ550539 | AY787905 | MHNGINVE29949 | 2             | 1 | 1 | 1 |
|                              | <i>Sertularella mediterranea</i>  | FJ550403                  | FJ550546 | FJ550479 | MHNGINVE32948 | 2             | 1 | 1 | 1 |
|                              | <i>Sertularia perpusilla</i>      | EU305532                  |          | AY787894 | MHNGINVE29765 | 2             | 1 | 1 | 1 |
|                              | <i>Symplectoscyphus turgidus</i>  | FJ550377                  | FJ550524 | FJ550462 | MHNGINVE29467 | 2             | 1 | 1 | 1 |
|                              | <i>Thyrososcyphus marginatus</i>  | FJ550430                  | FJ550573 | FJ550495 | MHNGINVE35477 | 2             | 1 | 1 | 1 |
|                              | <i>Thuaria thuja</i>              | EU305536                  | EU305503 | AY787908 | MHNGINVE29951 | 2             | 1 | 1 | 1 |
|                              | Statocysta                        |                           |          |          |               |               |   |   |   |
| Aequoreidae                  | <i>Aequorea aequorea</i>          | EU305505                  | AF358076 | AY512518 |               | 0             | 0 | 1 | 1 |
|                              | <i>Aequorea floridana</i>         | EU305506                  |          |          |               | 0             | 0 | 1 | 1 |
|                              | <i>Aequorea victoria</i>          | AY920799                  | AF358077 | EU305469 | KUNHM2867     | 0             | 0 | 1 | 1 |
|                              | <i>Rhacostoma atlantica</i>       | EU305528                  | EU305501 |          |               | 0             | ? | ? | ? |

(continued)

Table 1 Continued

| Taxonomic hierarchy | Species                           | GenBank accession numbers |          |          | Voucher         | Characters |   |   |   |
|---------------------|-----------------------------------|---------------------------|----------|----------|-----------------|------------|---|---|---|
|                     |                                   | 28s                       | 18s      | 16s      |                 | 1          | 2 | 3 | 4 |
| Blackfordiidae      | <i>Blackfordia virginica</i>      | AY920800                  | AF358078 | AY512516 |                 | 0          | 0 | 1 | 1 |
| Campanulariidae     | <i>Clytia hemisphaerica</i>       | FJ550457                  | AY789753 | EU999221 |                 | 0          | 0 | 1 | 1 |
|                     | <i>Clytia noliformis</i>          | EU272554                  | DQ064795 | DQ064792 |                 | 0          | 0 | 1 | 1 |
|                     | <i>Eucheilota maculata</i>        | FJ550444                  | FJ550587 | FJ550501 |                 | 0          | 0 | 1 | 1 |
|                     | <i>Eucheilota menoni</i>          | FJ550427                  | FJ550570 | FJ550493 | MHNGINVE33457   | 0          | 0 | 1 | 1 |
|                     | <i>Gonothyrax loveni</i>          | FJ550404                  | AY789766 | AY789827 | MHNGINVE29034   | 2          | 1 | 1 | 1 |
|                     | <i>Laomedea calceolifera</i>      | FJ550447                  | AY789768 | AY789829 | MHNGINVE37296   | 2          | 1 | 1 | 1 |
|                     | <i>Obelia bidentata</i>           | FJ550446                  | AY789754 | AY789815 | MHNGINVE37294   | 0          | 1 | 1 | 1 |
|                     | <i>Obelia geniculata</i>          | FJ550405                  | AY789769 | AY530362 |                 | 0          | 1 | 1 | 1 |
|                     | <i>Silicularia rosea</i>          | FJ550406                  | AY789727 | AY789792 | MHNGINVE25072   | 1          | 0 | 1 | 1 |
| Campanulinidae      | <i>Calycella syringa</i>          | FJ550372                  | AY789776 | AY789833 |                 | 0          | 0 | 1 | 1 |
|                     | <i>Campanulina panicula</i>       | FJ550452                  | FJ550596 | FJ550511 | MHNGINVE48748   | 2          | 1 | 1 | 1 |
| Eirenidae           | <i>Eirene viridula</i>            | FJ550445                  | FJ550588 | FJ550502 |                 | 0          | 0 | 1 | 1 |
|                     | <i>Eutima curva</i>               | FJ550455                  | FJ550599 | FJ550514 | MHNGINVE33468   | 0          | ? | 1 | 1 |
|                     | <i>Eutima gegenbauri</i>          | FJ550456                  | FJ550600 | FJ550515 | MHNGINVE31748   | 0          | 0 | 1 | 1 |
|                     | <i>Eutima sapinhua</i>            | EU305515                  | EU305493 |          |                 | 0          | ? | 1 | 1 |
| Malagazziidae       | <i>Octophialucium indicum</i>     | EU272577                  | EU272626 | AY787897 | MHNGINVE29970   | 0          | 0 | 1 | 1 |
| Mitrocomidae        | <i>Mitrocomella niwai</i>         | FJ550392                  | FJ550536 | FJ550473 |                 | 0          | 0 | 1 | 1 |
|                     | <i>Tiaropsidium kelseyi</i>       | EU305537                  | AF358079 | EU305485 |                 | 0          | 0 | 1 | 1 |
|                     | <i>Tiaropsis multicirrata</i>     | FJ550386                  | FJ550531 | FJ550468 |                 | 0          | 0 | 1 | 1 |
| Phialellidae        | <i>Phialella quadrata</i>         | FJ550393                  | FJ550537 | FJ550474 | MHNGINVE33466   | 0          | 1 | 1 | 1 |
|                     | <i>incerta sedis</i>              |                           |          |          |                 |            |   |   |   |
| Hebellidae          | <i>Anthohebella parasitica</i>    | EU272545                  | EU272603 | AY787918 | MHNGINVE29762   | 1          | 0 | 1 | 1 |
| Lafoeidae           | <i>Hebella venusta</i>            | FJ550431                  | FJ550574 | FJ550496 | MHNGINVE35476   | 0          | 0 | 1 | 1 |
|                     | <i>Lafoea dumosa</i>              | EU305520                  |          | AY787917 | MHNGINVE29952   | 2          | 1 | 1 | 1 |
| Melicertidae        | <i>Melicertum octocostatum</i>    | EU272575                  | AY920757 | EU305479 | G.Mackie:AGC209 | 0          | 0 | 0 | 1 |
| Tiarannidae         | <i>Stegopoma plicatile</i>        | FJ550454                  | FJ550598 | FJ550513 | MHNGINVE48755   | 2          | 1 | 1 | 1 |
| Laodiceidae         | <i>Staurodiscus gotoi</i>         | FJ550391                  | FJ550535 | FJ550472 | MHNGINVE33467   | 0          | 0 | 1 | 1 |
| Siphonophorae       |                                   |                           |          |          |                 |            |   |   |   |
| Calycophorae        |                                   |                           |          |          |                 |            |   |   |   |
| Clausophyidae       | <i>Clausophyes ovata</i>          | EU305508                  | AY937336 | AY935294 | YPM35349        | 1          | 2 | 0 | 0 |
| Diphyidae           | <i>Sulculeolaria quadrivalvis</i> | EU272594                  | AY937329 | AY935288 | YPM35357        | 1          | 2 | 0 | 0 |
| Hippopodiidae       | <i>Hippopodius hippopus</i>       | EU305517                  | AY937356 | AY935314 | YPM35045        | 1          | 2 | 0 | 0 |
| Prayidae            | <i>Nectopyramis</i> sp.           | AY026377                  | AY937349 | AY935307 |                 | 1          | 2 | 0 | 0 |
|                     | <i>Praya dubia</i>                | EU305526                  | AY937326 | AY935285 | YPM35346        | 1          | 2 | 0 | 0 |
|                     | <i>Rosacea flaccida</i>           | EU305529                  | AY937328 | AY935287 | YPM35041        | 1          | 2 | 0 | 0 |
| Cystonectae         |                                   |                           |          |          |                 |            |   |   |   |
| Physaliidae         | <i>Physalia physalis</i>          | EU448095                  | AF358065 |          | YPM35345        | 1          | 2 | 3 | 1 |
| Physonectae         |                                   |                           |          |          |                 |            |   |   |   |
| Agalmatidae         | <i>Cordagalma cordiforme</i>      | EU272555                  | AY937317 | AY935275 | YPM35032        | 1          | 2 | 1 | 1 |
|                     | <i>Halistemma rubrum</i>          | EU272566                  | AY937323 | AY935281 | YPM35359        | 1          | 2 | 1 | 1 |
|                     | <i>Nanomi bijuga</i>              | EU272576                  | AY937338 | AY935296 | YPM35043        | 1          | 2 | 1 | 1 |
|                     | <i>Apolemia</i> sp.               | EU272546                  | AY937315 | AY935273 | YPM35090        | 1          | 2 | 3 | 1 |
| Erennidae           | <i>Erenna</i> sp.                 | EU305512                  | AY937361 |          | YPM35362        | 1          | 2 | 1 | 1 |
| Forskaliidae        | <i>Forskalia edwardsi</i>         | EU305516                  | AY937354 | AY935312 | YPM35036        | 1          | 2 | 1 | 1 |
| Physophoridae       | <i>Physophora hydrostatica</i>    | EU272582                  | AY937342 | AY935300 | YPM35046        | 1          | 2 | 1 | 1 |
| Rhodaliidae         | <i>Stephalia dilata</i>           | EU305534                  | AY937357 | AY935315 | YPM35358        | 1          | 2 | 1 | 1 |

(continued)



Table 1 Continued

| Taxonomic hierarchy        | Species                           | GenBank accession numbers |          |          | Voucher           | Characters |   |   |   |
|----------------------------|-----------------------------------|---------------------------|----------|----------|-------------------|------------|---|---|---|
|                            |                                   | 28s                       | 18s      | 16s      |                   | 1          | 2 | 3 | 4 |
| Trachylina                 |                                   |                           |          |          |                   |            |   |   |   |
| Limnomedusae               |                                   |                           |          |          |                   |            |   |   |   |
| Olindiasidae               | <i>Aglauropsis aeora</i>          | AY920793                  | AY920754 | EU293973 |                   | 0          | 3 | 0 | 1 |
|                            | <i>Astrohydra japonica</i>        | AY920794                  |          | EU293975 |                   | 0          | 3 | 0 | 1 |
|                            | <i>Limnocnida tanganyicae</i>     | AY920795                  | AY920755 | EU293972 |                   | 0          | 0 | 0 | 1 |
|                            | <i>Maeotias marginata</i>         | EU247810                  | AF358056 | AY512508 |                   | 0          | 3 | 0 | 1 |
|                            | <i>Olindias phosphorica</i>       | EU247808                  | AY920753 | AY512509 | MHNGINVE29811     | 0          | 3 | 0 | 1 |
|                            | <i>Olindias sambaquiensis</i>     | EU247809                  | EU247814 | EU293977 |                   | 0          | 3 | 0 | 1 |
| Narcomedusae               |                                   |                           |          |          |                   |            |   |   |   |
| Aeginidae                  | <i>Aegina citrea</i>              | AY920789                  | EU247813 | EU293997 |                   | 0          | 4 | 4 | 2 |
|                            | <i>Solmundella bitentaculata</i>  | EU247795                  | EU247812 | EU293998 | MHNGINVE31746     | 0          | 4 | 4 | 2 |
| Cuninidae                  | <i>Sigiweddella</i> sp.           | EU247796                  |          | EU293996 | JAMSTECI060320CN1 | 0          | 4 | 4 | 2 |
|                            | <i>Solmissus marshalli</i>        | AY920790                  | AF358060 | EU294001 |                   | 0          | 4 | 4 | 2 |
| Tetraplatiidae             | <i>Tetraplatia volitans</i>       | DQ002502                  | DQ002501 | EU293999 | KUMIP314322       | 0          | 4 | 4 | 2 |
| Trachymedusae              |                                   |                           |          |          |                   |            |   |   |   |
| Geryoniidae                | <i>Geryonia proboscidalis</i>     | EU247807                  | EU247816 | EU293979 | JAMSTEC RB-BWD-4  | 0          | 4 | 4 | 2 |
| Haliscratidae              | <i>Botrynema brucei</i>           | EU247798                  | EU247822 | EU293982 | JAMSTECI060319bN4 | 0          | 4 | 4 | 2 |
|                            | <i>Haliscera conica</i>           | EU247797                  | EU247825 | EU293981 |                   | 0          | 4 | 4 | 2 |
| Rhopalonematidae           | <i>Aglantha digitale</i>          | AY920791                  | EU247821 | EU293985 |                   | 0          | 4 | 4 | 2 |
|                            | <i>Aglaura hemistoma</i>          | EU247803                  | EU247818 | EU293984 | MHNGINVE31745     | 0          | 4 | 4 | 2 |
|                            | <i>Amphogona apicata</i>          | EU247801                  |          | EU293994 | JAMSTEC I060314A2 | 0          | 4 | 4 | 2 |
|                            | <i>Crossota rufobrunnea</i>       | EU247800                  | EU247824 | EU293986 | JAMSTECI060319bN4 | 0          | 4 | 4 | 2 |
|                            | <i>Pantachogon haeckeli</i>       | AY920792                  | AF358062 | EU293988 |                   | 0          | 4 | 4 | 2 |
| <i>Rhopalonema velatum</i> | EU247804                          | EU247819                  | EU293992 |          | 0                 | 4          | 4 | 2 |   |
| Scyphozoa                  |                                   |                           |          |          |                   |            |   |   |   |
| Coronatae                  |                                   |                           |          |          |                   |            |   |   |   |
| Atollidae                  | <i>Atolla vanhoeffeni</i>         | AY026368                  | AF100942 |          |                   | 0          | 3 | 0 | 2 |
| Nausithoidae               | <i>Nausithoe rubra</i>            | AY920776                  | AF358095 |          |                   | 0          | 3 | 0 | 2 |
| Rhizostomeae               |                                   |                           |          |          |                   |            |   |   |   |
| Catostylidae               | <i>Catostylus</i> sp.             | AY920777                  | AF358100 |          |                   | 0          | 3 | 0 | 2 |
| Semaestomeae               |                                   |                           |          |          |                   |            |   |   |   |
| Pelagiidae                 | <i>Chrysaora melanaster</i>       | AY920780                  | AF358099 |          |                   | 0          | 3 | 0 | 2 |
| Ulmaridae                  | <i>Phacellophora camtschatica</i> | AY920778                  | AF358096 |          |                   | 0          | 3 | 0 | 2 |
| Staurozoa                  |                                   |                           |          |          |                   |            |   |   |   |
| Cleistocarpida             |                                   |                           |          |          |                   |            |   |   |   |
|                            | <i>Craterolophus convolvulus</i>  | AY920781                  | AY845344 | AY845343 |                   | 0          | 3 | 0 | 1 |
| Cubozoa                    |                                   |                           |          |          |                   |            |   |   |   |
| Carybdeida                 |                                   |                           |          |          |                   |            |   |   |   |
| Alatinidae                 | <i>Alatina mordens</i>            | GQ849058                  | GQ849082 |          | USNM1124421       | 0          | 3 | 0 | 2 |
| Carukiidae                 | <i>Carukia barnesi</i>            | GQ849059                  | AF358107 | GQ849097 | USNM1124558       | 0          | 3 | 0 | 2 |
| Carybdeidae                | <i>Carybdea rastonii</i>          | AY920787                  | AF358108 | GQ849112 | AMSG17493         | 0          | 3 | 0 | 2 |
|                            | <i>Carybdea xaymacana</i>         | GQ849067                  | GQ849090 | GQ849114 | USNM1073334       | 0          | 3 | 0 | 2 |
| Tamoyidae                  | <i>Tamoya haplonema</i>           | GQ849062                  | GQ849085 | GQ849122 |                   | 0          | 3 | 0 | 2 |
| Tripedaliidae              | <i>Tripedalia cystophora</i>      | GQ849065                  | GQ849088 | GQ849124 | USNM1124454       | 0          | 3 | 0 | 2 |
| Chiropodidae               | <i>Chiropsella bronzie</i>        | AY920786                  | AF358103 | GQ849099 | QMG327938         | 0          | 3 | 0 | 2 |
|                            | <i>Chiropsalmus quadrumanus</i>   | GQ849056                  | GQ849079 | GQ849111 | DZUFRJ1104        | 0          | 3 | 0 | 2 |

Characters are described in detail in the Appendix 1.

KUMIP=University of Kansas Museum of Invertebrate Paleontology, KUNHM=University of Kansas Natural History Museum; MHNG=Muséum d'histoire naturelle de Genève; YPM=Yale Peabody Museum; USNM=US National Museum of Natural History; JAMSTEC=Japan agency for marine-earth science and technology.

and the position of the gonophore (proximal to the base of the polyp/towards the oral end of the polyp/not applicable). Morphological characters and character states are described in detail in the Appendix 1 and character coding is summarized in Table 1.

### Reconstruction of ancestral character states

Reconstructions of characters using a global likelihood criterion were performed in Mesquite (Maddison and Maddison 2007) on the ML tree generated from the combined analysis (Supplementary Fig. S1). ML reconstructions were performed using the MK1 (Markov k-state 1 parameter model), which corresponds to the Mk model from Lewis (2001). This model estimates a single parameter (the rate of change in character state) from the data. All transition rates of character states are thus set as equal. For each node in the tree, reconstruction techniques determined the character state that maximized the global distribution of characters at the tips of the tree (while allowing all other node values to vary). Such reconstructions must be carried out on a fully resolved tree with branch lengths, and thus are dependent both on the tree's topology and its branch lengths. A likelihood decision threshold (LDT) of 2.0 log units was used as a cutoff to determine the best estimate for a character state at each particular node (Pagel 1999). The assignment of the best estimate of character state was determined by taking the difference in log likelihood scores between character states (Pagel 1999). If the difference between states differed by 2.0 log units or more, the state with the lower likelihood score was rejected, and the state with the higher likelihood score was reported as the best estimate for the character state at that node. If the difference in log likelihood scores did not exceed 2.0 log units, the node was reported as uncertain.

## Results and discussion

### Phylogenetic patterns

The phylogeny constructed from the combined data matrix with the bootstrap values is shown in Supplementary Figure S1. This topology is largely congruent with previous studies using the same markers (e.g., Cartwright et al. 2008; Collins et al. 2008; Leclère et al. 2009). The monophyly of Hydrozoa is well supported, with a bootstrap value (bt) of 99. In addition, the hydrozoan clade Trachylina is well supported (bt = 91) but the more diverse Hydroidolina is not (bts = 56). Within Hydroidolina, this phylogeny contains several

well-supported clades (bts >95), including Capitata, Aplanulata, Siphonophorae and Leptothecata. Anthoathecata (Capitata, Aplanulata, Siphonophorae and Filifera) is polyphyletic, consistent with previous studies (Collins et al. 2006; Cartwright et al. 2008). Filifera is polyphyletic and the filiferan clades are labeled I–IV (Figs. 2 and 3, Supplementary Figure) according to Cartwright et al. (2008). These clades are recognized on the basis of their monophyly in the molecular analysis (although some are weakly supported) and on their morphological synapomorphies (discussed in Cartwright et al. 2008). This analysis failed to recover strong support for the deeper nodes that reflect relationships among major clades of Hydroidolina. Thus, robust reconstructions of ancestral states for these deep nodes are unreliable. Instead, we focus our discussion on the well-supported clades within Hydroidolina. Figures 2 and 3 depict topologies identical to Supplementary Fig. S1. Although the names of the terminal taxa are not shown in Figs. 2 and 3, the order of the taxa from top to bottom is exactly the same as Supplementary Fig. S1.

### Evolution of hydrozoan medusae

Figure 2A depicts reconstructions of ancestral character states for medusae and reduced forms of medusae (sporosacs and medusoids). The presence of a medusa was recovered as ancestral for hydrozoans. Within Capitata, medusae are reduced to medusoids three separate times and to sporosacs two times. The phylogenetic patterns within the filiferan clades indicate that there are likely several independent reductions to medusoids and sporosacs, but because of poorly-supported sister-group relationships most of the reconstructions are uncertain. One instance of medusal re-evolution is recovered in *Podocoryna exigua* (Filifera III). Medusae are absent in the leptothecate clade Macrocolonia (Leclère et al. 2009), with one independent regain of a medusoid in *Amphisbetia operculata*. Species with medusae, medusoids and sporosacs are found in the leptothecate clade Statocysta, with multiple instances of medusal reduction, consistent with the findings of Leclère et al. (2009). Within Aplanulata, one instance of medusal re-evolution in *Ectopleura dumortieri* and several independent reductions to medusoids and sporosacs were recovered, consistent with the findings of Nawrocki et al. (in review). Gonophores were lost completely in *Brinkmannia hexactinellidophila* (Filifera II) and in the Hydra lineage (Aplanulata).

The complex history of hydrozoan medusae has been discussed extensively amongst researchers of

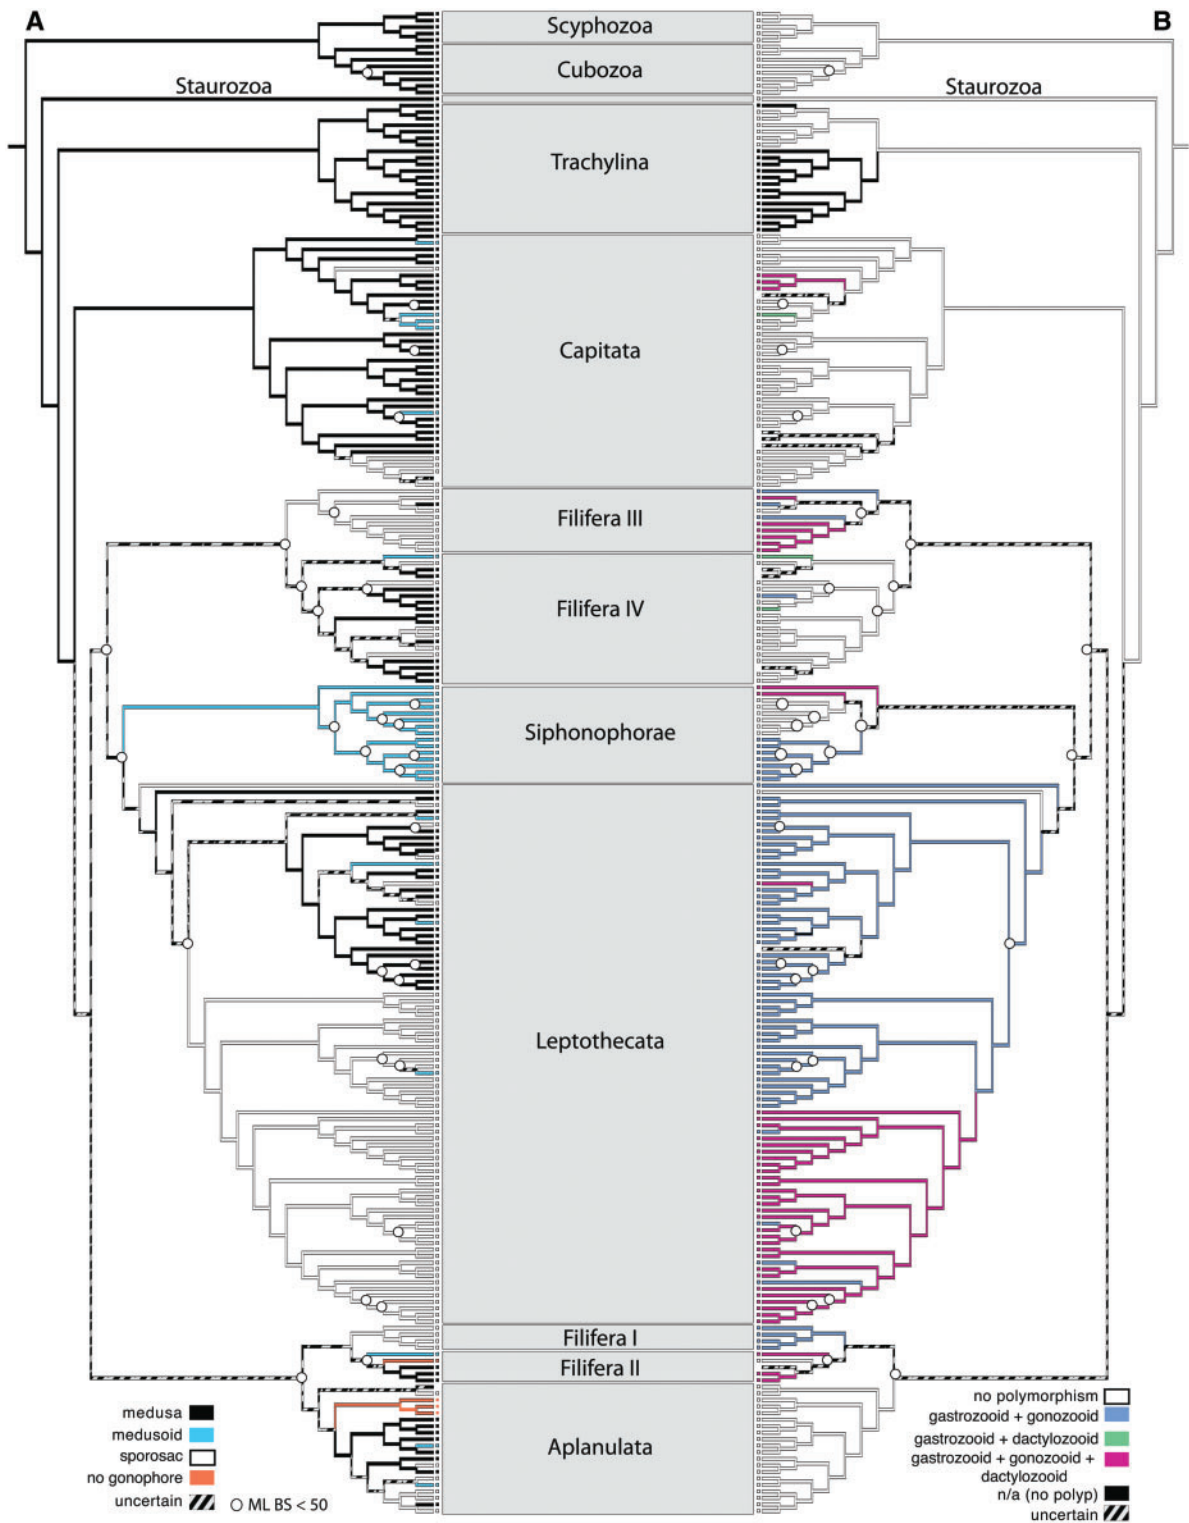

**Fig. 2** (A) Reconstructions of ancestral character states of taxa with medusa (black), medusoid (blue), sporosac (white), or of uncertain status (hatched). (B) Reconstructions of ancestral character states of taxa displaying polymorphism: no polymorphism (white), gonozoid (blue), dactylozoid (green), gonozoid plus dactylozoid (pink), no polyp (black), or of uncertain status (hatched). Topology is the ML tree recovered from the combined data set. Open circles at nodes represent poorly supported nodes (bootstrap support <50). A LDT was set at 2.0 log units. The identical topology with the exact order of terminal taxa, but including the species names and bootstrap values, can be found in the Supplementary Figure.

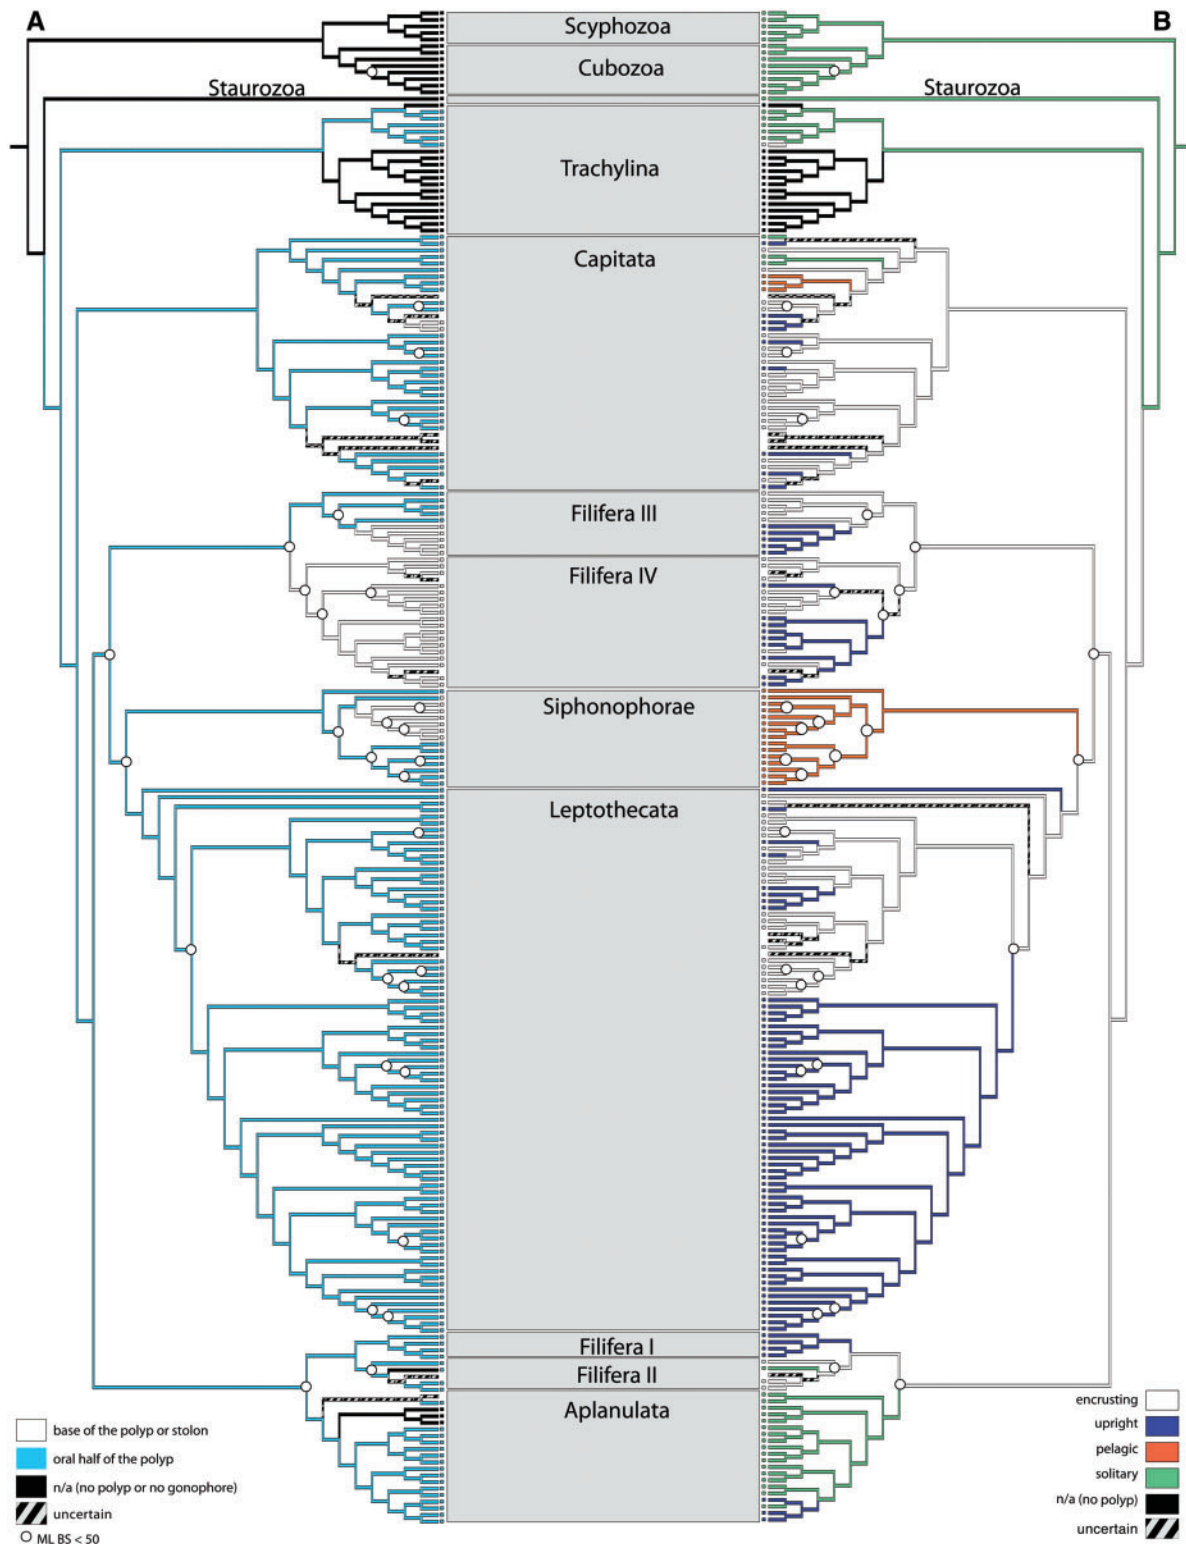

**Fig. 3** (A) Reconstructions of ancestral character states of position of gonophore bud. Position at the base of the polyp or stolon (white), position towards the oral end of the polyp (blue), position not applicable (no gonophore or no polyp) (black), or status uncertain (hatched). (B) Reconstructions of ancestral character states of taxa displaying the organization of the polyp stage. Encrusting colony (white), upright colony (blue), pelagic colony (orange), solitary polyp (green), polyp absent (black), of status uncertain (hatched). Topology is the ML tree recovered from the combined dataset. Open circles at nodes represent poorly supported nodes (bootstrap support <50). A LDT was set at 2.0 log units. The identical topology with the exact order of terminal taxa, but including the species names and bootstrap values, can be found in the Supplementary Figure.

hydrozoans. Allman (1864) and many to follow, argued that the degree of gonophore development from a fixed sporosac to a free-living medusa should be used to distinguish different hydrozoan genera. This classification scheme was questioned by many including Broch (1916), who recognized species with very similar or identical polyps possessed divergent gonophores. Later, molecular phylogenetic analyses were able to show from independent data, that indeed closely related species can have highly divergent types of gonophores (Cunningham and Buss 1993; Leclère et al. 2009, Nawrocki et al. in review) and thus the presence/absence of a gonophore type would not be appropriate for classifying genera. In this analysis, even after disregarding the poorly supported nodes, we can conservatively conclude that hydrozoan medusae have been lost several times, and re-gained at least twice, and that these patterns appear in closely related taxa.

### Evolution of polymorphism

Figure 2B depicts reconstructions of ancestral character states for polymorphic polyps (gastrozooids, gonozooids and dactylozooids). Polymorphism is found in all major hydroidolinan clades except Aplanulata, where it is inferred to be lost in the Aplanulata ancestor. Within Capitata, polymorphism evolved independently in the pelagic colonies of Porpitidae and in *Millepora* sp. Although all members of Siphonophorae are undoubtedly polymorphic, members of Calyophorae do not possess the types of polyps that were coded in this study (gonozooids and dactylozooids). All species of Leptothecata possess gonozooids, except *Melicertum octocostatum*, which buds gonophores from the gastrozooid body column. In Leptothecata, dactylozooids are inferred to have evolved in the ancestor of leptothecate clade that includes *Hydrodendron mirabile* and Plumularioidea. All species in Filifera III, with the exception of *Clava multicornis*, possess gonozooids, and dactylozooids are found in *Hydractinia symbiolongicarpus* and Stylasteridae. In Filifera IV, gonozooids evolved independently in *Hydrichthys boycei* and dactylozooids evolved independently in *Perarella schneideri* and *Pandea* sp. Given the unique morphology of *P. schneideri* dactylozooids (Appendix 1) and phylogenetic placement, these polyps are clearly not homologous with other hydrozoan dactylozooids. Also, dactylozooids in *Pandea* species are rarely observed (Appendix 1) so it is unclear if the *Pandea* sp. included in this study actually possesses dactylozooids.

The prevalence of polymorphism in hydroidolinan clades (excluding Aplanulata) provides clear evidence that the division of labor is a key evolutionary innovation in colonial hydrozoans. The evolution of the gonozooid, separating reproduction from feeding, is the most common strategy for division of labor. The evolution of other polyp types, including dactylozooids, appears to have evolved independently multiple times and most often from ancestors with gonozooids, as in the pattern recovered in Leptothecata.

### The position of the gonophore

With reference to Fig. 3A, the most common position of the gonophore in hydrozoans is towards the oral end of the polyp. Proximal placement of the gonophore occurs in *Solanderia* (Capitata), Stylasteridae (Filifera III) and Filifera IV (Fig. 3A). Cartwright et al. (2008) named the Filifera IV clade Gonoproxima in reference to the significance of the position of the gonophore in this clade. It is interesting to note that species with a proximal position of the gonophore are closely related to species bearing polymorphic polyps. The sister taxon to *Solanderia*, which has a proximal position of the gonophore, is *Millepora*, which possesses dactylozooids. Filifera IV possesses two taxa with dactylozooids and the clade is the putative sister lineage to Filifera III which includes polymorphic species. Rees (1957) speculated that the proximally placed gonophore is actually a reduced gonozooid. The patterns reported here support the idea that the physical separation of feeding and reproduction, either as in the proximal placement of the gonophore or as in the evolution of the gonozooid, may be linked in evolution.

### Organization of the polyp stage

In Fig. 3B, the presence of a solitary polyp was recovered as ancestral for hydrozoans, with coloniality evolving after the divergence of Trachylina and Hydroidolina. The small colonies found in some Limnomedusae are likely of independent origin. Coloniality was lost or greatly reduced in the capitate family Moerisiidae (*Moerisia* and *Odessia*) and in Filifera II, represented by the species *Brinckmannia hexactinellidophila*. In both lineages, the polyps are either solitary or may bud one or a few polyps that remain attached, forming pseudo-colonies. Coloniality was also lost in the ancestor of Aplanulata and upright colonies regained from a solitary ancestor in Tubulariidae. Pelagic colonies evolved twice, represented in the capitate family

Porpitidae and in the Siphonophorae. Transitions between upright and stolonial colonies occurred multiple times in hydrozoan evolution. Upright colonies appear to be a synapomorphy for the Leptothecata clade Macrocolonia as previously reported by Leclère et al. (2009).

Loss of coloniality is likely underestimated in our analysis as many solitary hydrozoans were not sampled, including Tricyclusidae, Margolopsidae, *Protohydra*, Boreohydridae, Acaulidae and *Nemopsis*. Aplanulata, which contains mostly solitary species, likely includes the families Tricyclusidae, Margolopsidae, and Acaulidae. The earliest diverging lineage of Aplanulata is Candalabridae, which comprise species with solitary polyps that can bud other polyps through root-like processes at their base, forming pseudo-colonies. *Hydra*, also part of Aplanulata, is a solitary polyp that adheres to the substrate with a specialized pedal disk. Also included in this clade are large, solitary deep-sea corymorphids such as *Branchiocerianthus imperator*, and the solitary meiofaunal corymorphids of the genus *Euphysa*. Sister to Corymorphidae is Tubulariidae (Collins et al. 2006; Nawrocki et al. in review), which includes colonial and solitary species.

## Conclusion

Although hydrozoan diversity, as revealed in the complexity of life cycles, has been appreciated for centuries, only recently have the data and tools become available to investigate the evolution of hydrozoan characters in a phylogenetic context. Previous phylogenetic studies on clades within Hydrozoa revealed multiple instances of loss, and sometimes regain, in prominent aspects of the hydrozoan life cycle (Cunningham and Buss 1993; Collins 2002; Collins et al. 2006; Dunn et al. 2005; Govindarajan et al. 2006; Leclère et al. 2007; Cartwright et al. 2008; Collins et al. 2008; Leclère et al. 2009; Nawrocki et al. in review). Through reconstructions of ancestral states of characters involving the morphologies of different life-cycle stages, we confirm the complexity of the evolution of hydrozoan characters and the importance of evaluating these characters in a phylogenetic context. Although these reconstructions of characters should be viewed as preliminary estimates, given that many key taxa are missing and there is low support at many of the deep nodes, it is clear that many of the characters used in this study serve as synapomorphies for major hydrozoan clades (i.e., upright colonies for the leptothecate clade Macrocolonia, solitary polyps for Aplanulata, medusae for Capitata and polymorphism for

Filifera III), but that homoplasy (independent loss and regain of these characters) is common in hydrozoan evolution. In fact, our evaluation of loss and regain of characters is likely an underestimate and a clearer picture awaits more complete sampling. In addition, it is anticipated that more data will resolve some of the deeper nodes so that evolutionary transitions between major hydrozoan clades can be evaluated.

Hydrozoans are unique amongst metazoans in that their component parts are relatively simple, constructed of two epithelial cell layers, a handful of cell types, and very little in the way of internal anatomy. Given this simplicity, hydrozoans have achieved remarkable diversity in their life-history stages. This study illustrates that hydrozoan evolution is replete with repeated patterns of convergence in characters involving the forms of polyps, colonies and medusae. These complex evolutionary patterns can, in part, be explained by the simple construction of hydrozoans; there is likely a limited number of ways to construct a complex character with two epithelial layers and a few cell types. Hence, given the constraints imposed by the simplicity of their component parts, combined with the diverse ecological and evolutionary strategies inherent in the different stages of the life cycle, it is not surprising that the evolution of hydrozoan characters is marked with multiple instances of convergence. Insight into the genetic controls responsible for these convergent characters will illuminate our understanding of the mechanisms underlying these intricate evolutionary patterns.

## Supplementary material

Supplementary material is available at *ICB* online.

## Acknowledgments

We would like to thank the Society of Integrative and Comparative Biology and the divisions of Invertebrate Zoology, and Systematics and Evolutionary Biology, for support of this symposium. We also thank M.S. Barbeitos for providing secondary structure alignments and for help with the analyses, the Ohio Supercomputer Center for use of their cluster and C.W. Dunn for discussions on siphonophores.

## Funding

The National Science Foundation AToL EF-0531779 and DEB-0953571 (to P.C.); The KU Madison and Lila Self Foundation and the National Science Foundation DEB-0910211 (to A.M.N.).

## References

- Allman GJ. 1864. On the construction and limitation of genera among the Hydroida. *Ann Mag Nat Hist Ser* 13:345–80.
- Bavestrello G, Puce S, Cerrano C, Balduzzi A. 2000. Life history of *Perarella schneideri* (Hydrozoa, Cytaeididae) in the Ligurian Sea. *Scientia Marina* 64:141–6.
- Boero F, Bouillon J. 1987. Inconsistent evolution and paedomorphosis among the hydroids and medusae of the Athecatae/Anthomedusae and the Thecatae/Leptomedusae (Cnidaria, Hydrozoa). In: Bouillon J, Boero F, Cicogna F, Cornelius PFS, editors. *Modern trends in the systematics, ecology, and evolution of hydroids and hydromedusae*. Oxford: Clarendon Press.
- Boero F, Sarà M. 1987. Motile sexual stages and evolution of Leptomedusae (Cnidaria). *Boll Zool* 54:131–9.
- Bouillon J. 1985. Essai de classification des hydro-polypes-hydroméduses (Hydrozoa-Cnidaria). *Indo-Malayan Zool* 2:29–243.
- Bouillon J, Boero F. 2000. Synopsis of the families and genera of the hydromedusae of the world, with a list of worldwide species. *Thalassia Salent* 24:47–296.
- Bouillon J, Gravili C, Pagès F, Gili JM, Boero F. 2006. An introduction to Hydrozoa. Paris: Publications Scientifiques du Muséum.
- Bouillon J, Medel MD, Pagès F, Gili JM, Boero F, Gravili C. 2004. Fauna of the Mediterranean Hydrozoa. *Scientia Marina* 68:5–438.
- Brinkmann-Voss A. 1970. Anthomedusae/Athecata (Hydrozoa, Cnidaria) of the Mediterranean (Part I). *Capitata Fauna Flora Golfo di Napoli* 39:1–96.
- Broch HJ. 1916. Hydroida (Part I). *Danish Ingolf Exped* 5:1–66.
- Cartwright P. 2003. Developmental insights into the origin of complex colonial hydrozoans. *Integ Comp Biol* 43:82–6.
- Cartwright P. 2004. The development and evolution of hydrozoan polyp and colony form. In: Fautin DG, Westfall JA, Cartwright P, Daly M, Wyttenbach CR, editors. *Coelenterate biology 2003: trends in research on Cnidaria and Ctenophora*. The Netherlands: Kluwer Academic Publishers.
- Cartwright P, Evans NM, Dunn CW, Marques AC, Miglietta MP, Collins AG. 2008. Phylogenetics of Hydroidolina (Cnidaria, Hydrozoa). *J Mar Biol Assoc* 88:1163–72.
- Castresana J. 2000. Selection of conserved blocks from multiple alignments for their use in phylogenetic analysis. *Mol Biol Evol* 17:540–52.
- Collins A. 2002. Phylogeny of Medusozoa and the evolution of cnidarian life cycles. *J Evol Biol* 15:418–32.
- Collins AG, Bentlage B, Lindsay D, Haddock SHD, Lindner A, Norenburg JL, Jarms G, Jankowski T, Cartwright P. 2008. Phylogenetics of Trachylina (Cnidaria, Hydrozoa). *J Mar Biol Assoc* 88:1671–84.
- Collins AG, Schuchert P, Marques AC, Jankowski T, Medina M, Schierwater B. 2006. Medusozoan phylogeny and character evolution clarified by new large and small subunit rDNA data and an assessment of the utility of phylogenetic mixture models. *Syst Biol* 55:97–115.
- Collins AG, Winkelmann S, Hadrys H, Schierwater B. 2005. Phylogeny of Capitata and Corynidae (Cnidarian, Hydrozoa) in light of mitochondrial 16s rDNA data. *Zool Scr* 34:91–9.
- Cunningham CW, Buss LW. 1993. Molecular evidence for multiple episodes of paedomorphosis in the family Hydractiniidae. *Bioch Syst Ecol* 21:57–69.
- Dunn CW, Pugh PR, Haddock SHD. 2005. Molecular phylogenetics of siphonophora (Cnidaria), with implications for the evolution of functional specialization. *Syst Biol* 54:916–35.
- De Rijk P, Wachter RD. 1993. DCSE, an interactive tool for sequence alignment and secondary structure research. *Comput Appl Biosci* 9:735–40.
- Edgar RC. 2004. MUSCLE: multiple sequence alignment with high accuracy and high throughput. *Nucleic Acids Res* 32:1792–7.
- Evans N, Lindner A, Raikova E, Collins AG, Cartwright P. 2008. Phylogenetic placement of the enigmatic parasite, *Polypodium hydriforme*, within the Phylum Cnidaria. *BMC Evol Biol* 8:139.
- Gouy M, Guindon S, Gascuel O. 2010. SeaView version 4 : a multiplatform graphical user interface for sequence alignment and phylogenetic tree building. *Mol Biol Evol* 27:221–4.
- Govindarajan AF, Boero F, Halanych KM. 2006. Phylogenetic analysis with multiple markers indicates repeated loss of the adult medusa stage in Campanulariidae (Hydrozoa, Cnidaria). *Mol Phyl Evol* 38:820–34.
- Hyman L. 1940. *The invertebrates. I. Protozoa through Ctenophora*. New York: McGraw-Hill.
- Katoh K, Toh H. 2008. Recent developments in the MAFFT multiple sequence alignment program. *Brief Bioinform* 9:286–98.
- Katoh M, Kuma M. 2002. MAFFT: a novel method for rapid multiple sequence alignment based on fast Fourier transform. *Nucleic Acids Res* 30:3059–66.
- Leclère L, Schuchert P, Cruaud C, Couloux A, Manuel M. 2009. Molecular phylogenetics of Thecata (Hydrozoa, Cnidaria) reveals long-term maintenance of life history traits despite high frequency of recent character changes. *Syst Biol* 58:509–26.
- Leclère L, Schuchert P, Manuel M. 2007. Phylogeny of the Plumularioidea (Hydrozoa, Leptothecata): evolution of colonial organisation and life cycle. *Zool Scr* 36:371–94.
- Lewis PO. 2001. A likelihood approach to estimating phylogeny from discrete morphological character data. *Syst Biol* 50:913–25.
- Lindner A, Cairns SD, Cunningham CW. 2008. From offshore to onshore: multiple origins of shallow-water corals from deep-sea ancestors. *PLoS ONE* 3:e2429.

- Maddison WP, Maddison DR. 2008. Mesquite: a modular system for evolutionary analysis. Version 2.72 (<http://mesquiteproject.org>).
- Marques AC, Collins AG. 2004. Cladistic analysis of Medusozoa and cnidarian evolution. *Invert Biol* 123:23–42.
- Marques AC, Migotto AE. 2001. Cladistic analysis and new classification of the family Tubulariidae (Hydrozoa, Anthomedusae). *Pap Avuls Zool* 41:465–88.
- Miglietta MP, Schuchert P, Cunningham CW. 2009. Reconciling genealogical and morphological species in the Hydractiniidae (Cnidaria, Hydrozoa). *Zool Scr* 38:403–30.
- Miranda LS, Collins AG, Marques AC. 2010. Molecules clarify a Cnidarian life cycle: the “Hydrozoan” *Microhydrula limopsicola* is an early life stage of the Staurozoan *Haliclystus antarcticus*. *PLoS ONE* 5:e10182.
- Nawrocki AM, Barbeitos MS, Cartwright P. In review. Re-evolution of medusae in Aplanulata (Cnidaria: Hydrozoa).
- Nawrocki AM, Schuchert P, Cartwright P. 2010. Phylogenetics and evolution of Capitata (Cnidaria: Hydrozoa), and the systematics of Corynidae. *Zool Scr* 39:290–304.
- Nicholas KB, Nicholas HB Jr, Deerfield DW II. 1997. GeneDoc: analysis and visualization of genetic variation. *EMBnet.news* 4:14.
- Pagel M. 1999. The maximum likelihood approach to reconstructing ancestral character states of discrete characters on phylogenies. *Syst Biol* 48:612–22.
- Petersen KW. 1979. Development of coloniality in Hydrozoa. In: Larwood G, Rosen B, editors. *Biology and systematics of colonial organisms*. London: The Systematics Association Academic Press. p. 105–39.
- Petersen KW. 1990. Evolution and taxonomy in capitate hydroids and medusae (Cnidaria: Hydrozoa). *Zool J Linn Soc* 100:101–231.
- Rees WJ. 1957. Evolutionary trends in the classification of capitate hydroids and medusae. *Bulletin of the British Museum (Natural History)*. *Zool Ser* 4:456–536.
- Schnare MN, Damberger SH, Gray MW, Gutell R. 1996. Comprehensive comparison of structural characteristics in eukaryotic cytoplasmic large subunit (23S-like) ribosomal RNA. *J Mol Biol* 256:701–19.
- Schuchert P. 1996. The marine fauna of New Zealand: athecate hydroids and their medusae (Cnidaria: Hydrozoa). *New Zealand Oceanographic Institute Memoir* 106:1–159.
- Schuchert P. 2001. Hydroids of Greenland and Iceland (Cnidaria, Hydrozoa). *Meddelelser om Grønland*. *Bioscience* 53:1–184.
- Schuchert P. 2004. Revision of the European athecate hydroids and their medusae (Hydrozoa, Cnidaria): families of Oceanidae and Pachycordylidae. *Rev Suisse de Zool* 111:315–69.
- Schuchert P. 2006. The European athecate hydroids and their medusae (Hydrozoa, Cnidaria): Capitata Part 1. *Rev Suisse de Zool* 113:325–410.
- Schuchert P. 2007. The European athecate hydroids and their medusae (Hydrozoa, Cnidaria): Filifera Part 2. *Rev Suisse de Zool* 114:195–396.
- Stamatakis A. 2006. RAxML-VI-HPC: maximum likelihood-based phylogenetic analyses with thousands of taxa and mixed models. *Bioinformatics* 22:2688–90.
- Sukumaran J, Holder MT. 2009. SumTrees: summarization of split support on phylogenetic trees. *DendroPy Phylogenetic Computation Library Version* 2.6.1.
- Svoboda A, Cornelius PFS. 1991. The European and Mediterranean species of *Aglaophenia* (Cnidaria: Hydrozoa). *ZoologischeVerhandeligen* 274:1–72.
- Zuker M. 2003. Mfold web server for nucleic acid folding and hybridization prediction. *Nucleic Acids Res* 31:3406–15.

## Appendix 1

Description of characters and character state assignments. Characters and character states are numbered in the order in which they appear in Table 1.

### Character 1

Degree of development of the gonophore upon sexual maturity. 0 = medusa, 1 = medusoid, 2 = sporosac, 3 = no gonophore.

Free-living medusae are defined as swimming, feeding, autonomous individuals that spawn after separation from the polyp. Staurozoa, although they do not swim, were coded as having medusae because they have a mouth and feed. Medusoids (also referred to as eumedusoids), as defined here, do not feed (lack a functional mouth) but have radial canals, which in free-living medusae are part of the digestive system. Sporosacs (also referred to as cryptomedusoids and heteromedusoids), as defined here are gonophores that upon reproductive maturity lack a mouth and canal system. Most medusoids and sporosacs remain attached to the polyp upon spawning, but swimming medusoids (e.g., *C. pendula*) and abortive medusae (e.g., *Millepora* spp.) were coded as medusoids and swimming sporosacs (e.g., *D. conybeari*) were coded as sporosacs because of how they are defined above. Hydrozoan species that lack gonophores, and instead develop gametes in the epithelial tissues of the polyps (e.g., *Hydra* sp., *B. hexactinellidophila*), were coded as a separate character state.

### Character 2

Polyp organization. 0 = encrusting colony, 1 = upright colony, 2 = pelagic colony, 3 = solitary polyp, 4 = polyp stage absent (n/a).

Hydrozoan colonies either encrust a substrate, grow upright from a substrate, or swim in the water column. Colonies were coded as encrusting if they grow horizontally on a substrate in a stolonal or hydrohizal form. Upright colonies were defined as those that attach to the substrate but grow erect in



the water column. Upright colonies include branching colonies such as *Pennaria* sp., bush-like colonies such as *E. larynx*, and erect chitinous forms such as *S. ericopsis*. Pelagic colonies are those whose polyps are interconnected in a colony but function as an individual unit to swim in the water column. These include siphonophores and the pelagic members of Capitata (*Velella* sp., *Porpita* sp.). Species were coded as solitary if polyps do not form permanent stolonal connections with each other, even if they transiently share a gastrovascular cavity (e.g., *Candelabrum* sp.). Species that lack polyps as part of their life cycle were coded as non-applicable for this character.

### Character 3

Polymorphism. 0 = no polymorphism (gastrozooids only) 1 = gastrozooids + gonozooids, 2 = gastrozooids + dactylozooids, 3 = gastrozooids + gonozooids + dactylozooids, 4 = non-applicable (polyp stage absent).

Polyps of a colony can be identical or polymorphic. All colonies possess feeding polyps (gastrozooids) and in non-polymorphic colonies these polyps also serve other functions, such as gonophore budding, food gathering and defense. Polymorphic polyps are functionally specialized and morphologically distinct. Gonozooids are polyps specialized for reproduction (gonozooid) that bear gonophores on the polyp body column, and are morphologically distinct from gastrozooids, usually lacking a mouth and tentacles or with reduced tentacles. In siphonophores, gonozooids are interpreted as any palpon that is associated with reproductive structures. Dactylozooids are polyps specialized for food gathering and/or defense. They are morphologically distinct from gastrozooids, usually highly extensile with a dense population of nematocysts, and lacking a mouth and tentacles or with reduced tentacles.

In siphonophores, dactylozooids are interpreted as any palpon associated with defense. *Perarella schneideri* possesses two types of polyps, a short gastrozooid, as well as a long 'gastrozooid' with four small tentacles. We coded the long 'gastrozooid' as a dactylozooid based on its role in food acquisition (Bavestrello 2000). We coded *Pandea* sp. as having dactylozooids because it has been observed (rarely) that some species belonging to the genus possess tentaculozooids and/or dactylozooids. Schuchert (2007) reported tentaculozooids on *P. conica*, which lives on the shell of a pelagic gastropod, but noted that this was not found on all colonies of this species.

### Character 4

Placement of the gonophore bud. 0 = proximal to the polyp base, 1 = distal, towards the oral end of the polyp, 2 = non-applicable (no polyp or no gonophore). Most hydrozoan species bud gonophores on their mid-body region or toward the mouth of the polyp (distal end). Species that were found to bud gonophores at the polyp base (proximal end) or on the stolons or stalks of the colony were coded as proximal. In siphonophores, proximal gonophores were coded in those taxa that lack palpons associated with reproduction and have gonophores that are borne directly on the stem. Some filiferan species such as *Neoturris brevicornis*, *Koellikerina fasciculata*, *Turritopsis* sp., *B. vestia*, *C. caspia*, *Bougainvillia* sp., and *G. grisea* possess gonophores on the stalk below the polyp body column. In some cases these structures may be close to the polyp, but in all cases they are on the stalk and not the polyp body column. Thus, they are also coded as proximal. In many of these species, the stalk can be distinguished from the polyp body column by the presence of a perisarc (a chitinous exoskeleton).
